# Supplementary material for: Simultaneous aptasensor assay of ochratoxin A and adenosine triphosphate in beer based on Fe3O4 and SiO2 nanoparticle as carriers
Source: Royal Society of Chemistry journal article supplement (doi:10.1039/d0ay00311e), 2020-01-01
Supplement: d0ay00311e1.pdf [file d0ay00311e1.pdf]

## **Supplementary Information**

### **Simultaneous Aptasensor Assay of Ochratoxin A and Adenosine triphosphate in Beer based on Fe<sub>3</sub>O<sub>4</sub> and SiO<sub>2</sub> Nanoparticle as Carriers**

Xiluan Yan<sup>a</sup>, Mengmeng Jiang<sup>a</sup>, Yuting Jian<sup>a</sup>, Jing Luo<sup>a</sup>, Xinxin Xue<sup>a</sup>, Xin Chen<sup>a</sup>, Xiangjuan

Zheng<sup>c</sup>, Fanrong Ai<sup>b\*</sup>

<sup>a</sup>School of Resources Environmental & Chemical Engineering, Nanchang University, Nanchang 330031, PR China

<sup>b</sup>School of Mechanical & Electrical Engineering, Nanchang University, Nanchang 330031, PR China

<sup>c</sup> School of Chemistry, Nanchang University, Nanchang 330031, PR China

**\* Corresponding author**

E-mail: afr3755875@126.com

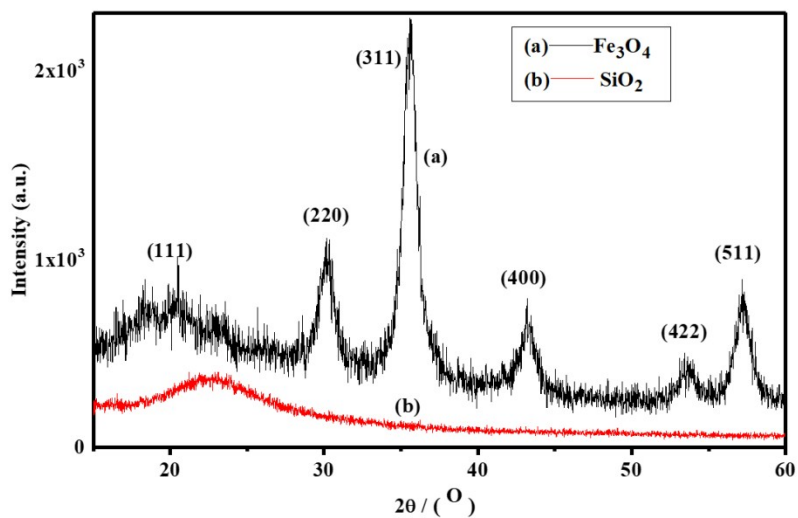

1  
2

**Fig. S1.** XRD pattern of the Fe<sub>3</sub>O<sub>4</sub> NPs (a) and SiO<sub>2</sub> NPs (b)

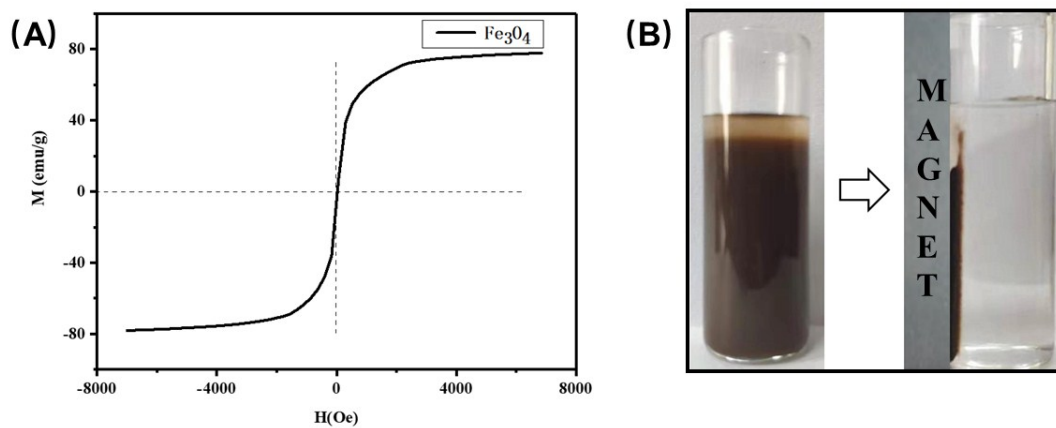

3  
4  
5

**Fig. S2.** (A) Magnetization curves of the Fe<sub>3</sub>O<sub>4</sub> NPs ;(B) Magnetic responsiveness of Fe<sub>3</sub>O<sub>4</sub> NPs

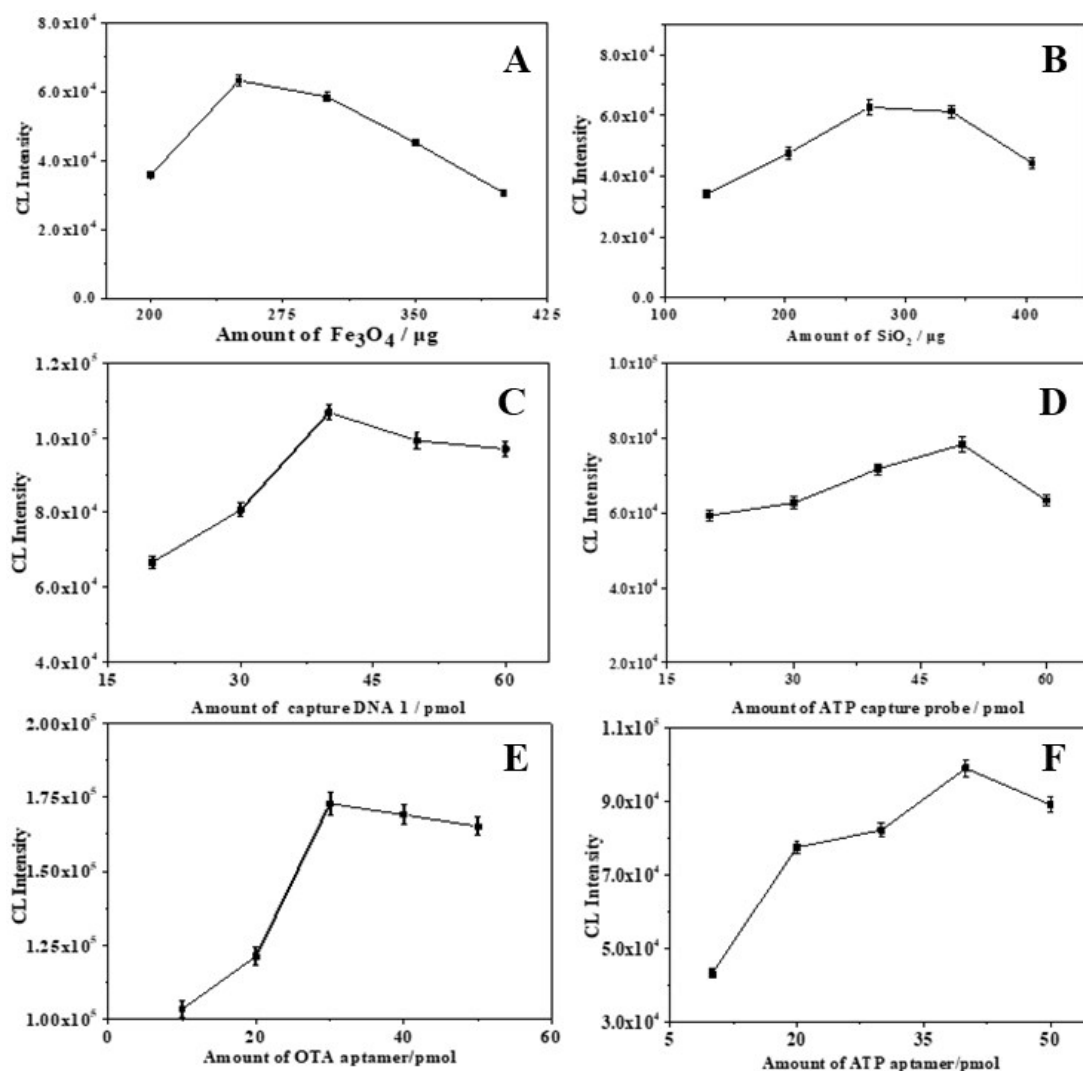

1

2 **Fig. S3.** CL intensity versus the amounts of Fe<sub>3</sub>O<sub>4</sub> NPs (A), SiO<sub>2</sub> NPs (B), capture  
3 DNA 1 (C), capture DNA 2 (D), OTA aptamer (E) and ATP aptamer (F).  
4 Experimental conditions: (A) 20 pmol of capture DNA 1; 20 pmol of OTA aptamer;  
5 OTA concentration is  $1.25 \times 10^{-7}$  M. (B) 20 pmol of capture DNA 2; 20 pmol of ATP  
6 aptamer; ATP concentration is  $1.00 \times 10^{-7}$  M. (C) 250 µg Fe<sub>3</sub>O<sub>4</sub> NPs; 20 pmol of OTA  
7 aptamer; OTA concentration is  $1.25 \times 10^{-7}$  M. (D) 270 µg SiO<sub>2</sub> NPs; 20 pmol of ATP  
8 aptamer; ATP concentration is  $1.00 \times 10^{-7}$  M. (E) 250 µg Fe<sub>3</sub>O<sub>4</sub> NPs and 40 pmol of  
9 capture DNA 1; OTA concentration is  $1.25 \times 10^{-7}$  M. (F) 270 µg SiO<sub>2</sub> NPs and 50  
10 pmol of capture DNA 2; ATP concentration is  $1.00 \times 10^{-7}$  M. Every data point was  
11 the mean of 3 measurements.

**Table S1.** Comparison of different detection methods

| Analytical target | Detection method                        | Label                                       | LOD         | Linear range     | Reference  |
|-------------------|-----------------------------------------|---------------------------------------------|-------------|------------------|------------|
| ATP               | fluorometric method                     | biotin- labeled                             | 140 nM      | 0.5~17.5 mM      | 1          |
| ATP               | photoelectrochemical immunoassay method | quantum dot - labeled                       | 3.7 $\mu$ M | 10~350 $\mu$ M   | 2          |
| ATP               | fluorescence method                     | Cy5-labeled                                 | 0.2 $\mu$ M |                  | 3          |
| OTA               | fluorescent method                      | fluorescence of carboxyfluorescein- labeled | 20 nM       | 0.02~0.4 $\mu$ M | 4          |
| OTA               | fluorescence method                     | label-free                                  | 16.5 nM     | 20~500 nM        | 5          |
| OTA               | immunchromatographic method             |                                             | 6.19 nM     |                  | 6          |
| Aflatoxin B1      |                                         |                                             | 1.6 nM      |                  |            |
| OTA               | immuno chromatographic method           |                                             | 0.79 nM     | 1.32~30 nM       | 7          |
| Zearalenone       |                                         |                                             | 1.82 nM     | 3.33~124 nM      |            |
| ATP               | fluorescence method                     | label-free                                  | 1.3 nM      | 10~100 nM        | 8          |
| Thrombin          |                                         |                                             | 0.007 nM    | 0.1~100 nM       |            |
| OTA               | SPR method                              |                                             | 3.15 nM     |                  | 9          |
| Aflatoxin B1      |                                         |                                             | 1.89 nM     | 1.89~11 nM       |            |
| OTA               | chemiluminiscence method                | label-free                                  | 9.02 nM     | 12.5~2500 nM     | This paper |
| ATP               |                                         |                                             | 9.31 nM     | 10~2000 nM       |            |

## 1 References

- 2 1. Y. S. Guo, J. Liu, G. X. Yang, X. F. Sun, H. Y. Chen and J. J. Xu, *Chem Commun*, 2015, **51**,  
3 862-865.
- 4 2. J. N. Tian, Y. Wang, S. Chen, Y. X. Jiang, Y. C. Zhao and S. L. Zhao, *Microchim Acta*, 2013,  
5 **180**, 203-209.
- 6 3. A. R. Ruslinda, Y. Ishiyama, X. Wang, T. Kobayashi and H. Kawarada, *J Electrochem Soc*,  
7 2012, **159**, J182-J187.
- 8 4. Y. Wei, J. Zhang, X. Wang and Y. X. Duan, *Biosens Bioelectron*, 2015, **65**, 16-22.
- 9 5. L. Lv, D. H. Li, R. J. Liu, C. B. Cui and Z. J. Guo, *Sensor Actuat B-Chem*, 2017, **246**, 647-652.
- 10 6. W. B. Shim, G. Kim, H. J. Ryu, M. Nam and D. H. Chung, *Food Sci Biotechnol*, 2009, **18**,  
11 641-648.
- 12 7. X. Zhang, K. He, Y. Fang, T. Cao, N. Paudyal, X. F. Zhang, H. H. Song, X. L. Li and W. H.  
13 Fang, *J Zhejiang Univ-Sc B*, 2018, **19**, 871-883.
- 14 8. K. Y. Wang, J. Liao, X. Y. Yang, M. Zhao, M. Chen, W. R. Yao, W. H. Tan and X. P. Lan,  
15 *Biosens Bioelectron*, 2015, **63**, 172-177.
- 16 9. T. Wei, P. P. Ren, L. L. Huang, Z. C. Ouyang, Z. Y. Wang, X. F. Kong, T. J. Li, Y. L. Yin, Y.  
17 N. Wu and Q. H. He, *Food Chem*, 2019, **300**.
